# Supplementary material for: A novel dried plum-like yolk–shell architecture of tin oxide nanodots embedded into a carbon matrix: ultra-fast assembly and superior lithium storage properties
Source: Royal Society of Chemistry journal article supplement (doi:10.1039/c8ta12399c), 2019-01-01
Supplement: c8ta12399c1.pdf [file c8ta12399c1.pdf]

## Electronic supplementary information

### A Novel Dried Plum-Like Yolk-Shell Architecture of Tin Oxide Nanodots Embedded into Carbon Matrix: Ultra-Fast Assembly and Superior Lithium Storage Property

Jin Leng,<sup>a</sup> Zhixing Wang,<sup>a</sup> Xinhai Li,<sup>a</sup> Huajun Guo,<sup>a</sup> Guochun Yan,<sup>a</sup> Qiyang Hu,<sup>a</sup> Wenjie Peng,<sup>a</sup> Jiexi Wang\*,<sup>a,b</sup>

<sup>a</sup> School of Metallurgy and Environment, Central South University, Changsha, Hunan, 410083, P. R. China.

<sup>b</sup> State Key Laboratory for Powder Metallurgy, Central South University, Changsha, Hunan, 410083, P. R. China.

\* Corresponding author, email: [wangjiexikeen@csu.edu.cn](mailto:wangjiexikeen@csu.edu.cn)

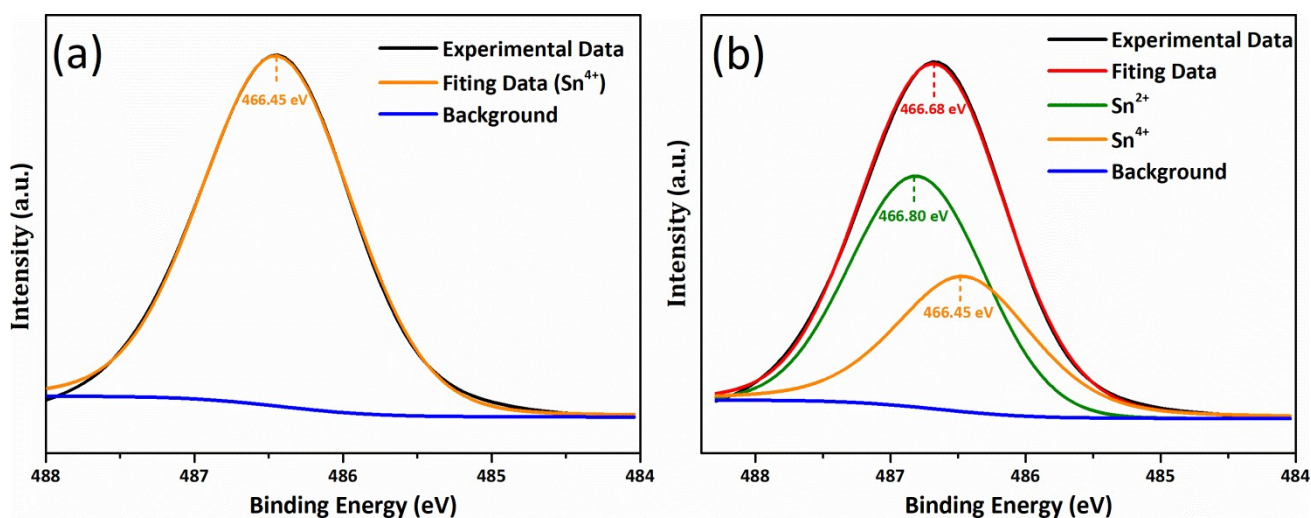

Figure S1. Sn 3d<sub>5/2</sub> XPS spectra of the pure SnO<sub>2</sub> particles (a) and SnO<sub>x</sub>-C composite (b).

As shown in Figure S1, no characteristic peak of Sn<sup>2+</sup> is observed in the XPS spectrum of the pure SnO<sub>2</sub> particles prepared by SP. However, the XPS spectrum of the YS-SnO<sub>x</sub>/C composite revealed a mixed crystal structure. The mole ratio of SnO and SnO<sub>2</sub> in the YS-SnO<sub>x</sub>/C composite evaluated by XPS spectrum was about 59/41. The amorphous carbon formed by the carbonization of PVP resulted in a reducing atmosphere around the SnO<sub>2</sub> particle during the high-temperature SP process, and the SnO phase is generated from the partial reduction of SnO<sub>2</sub>.

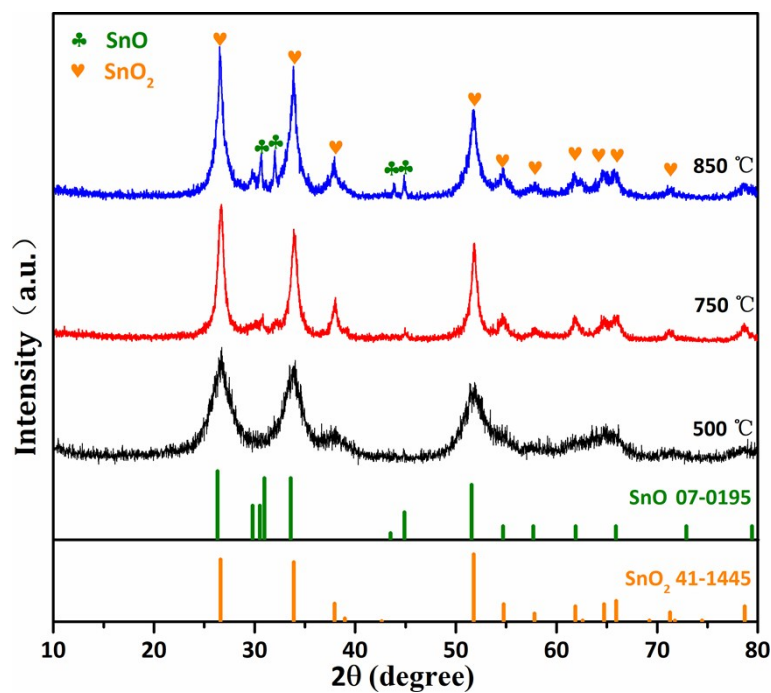

Figure S2. XRD patterns of the samples prepared by SP at different temperature.

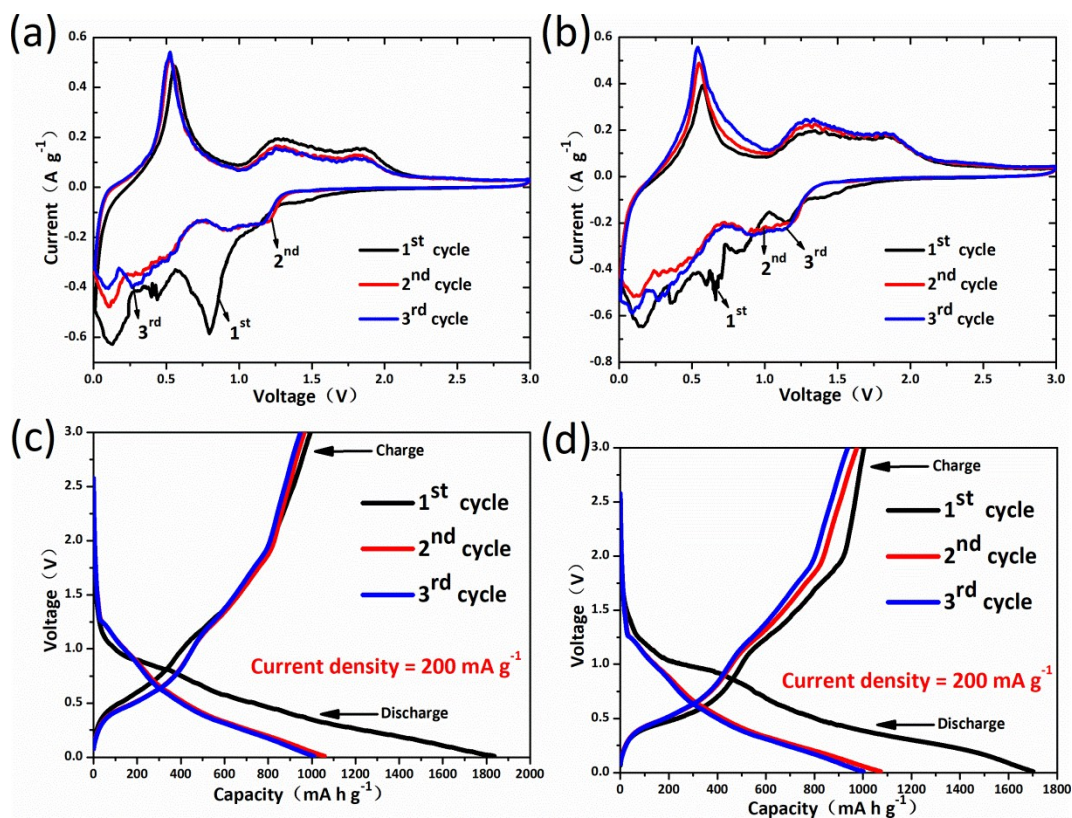

Figure S3. (a-b) The initial three CV curves at  $0.1 \text{ mV s}^{-1}$  and (c-d) charge and discharge curves. (a, c) P-SnO<sub>2</sub>; (b, d) D-SnO<sub>2</sub>.
